# Supplementary material for: DHA Induces Cell Death through the Production of ROS and the Upregulation of CHOP in Fibroblast-like Synovial Cells from Human Rheumatoid Arthritis Patients
Source: MDPI journal article supplement (doi:10.3390/ijms24021734), 2023-01-15
Supplement: s1 [file s1]

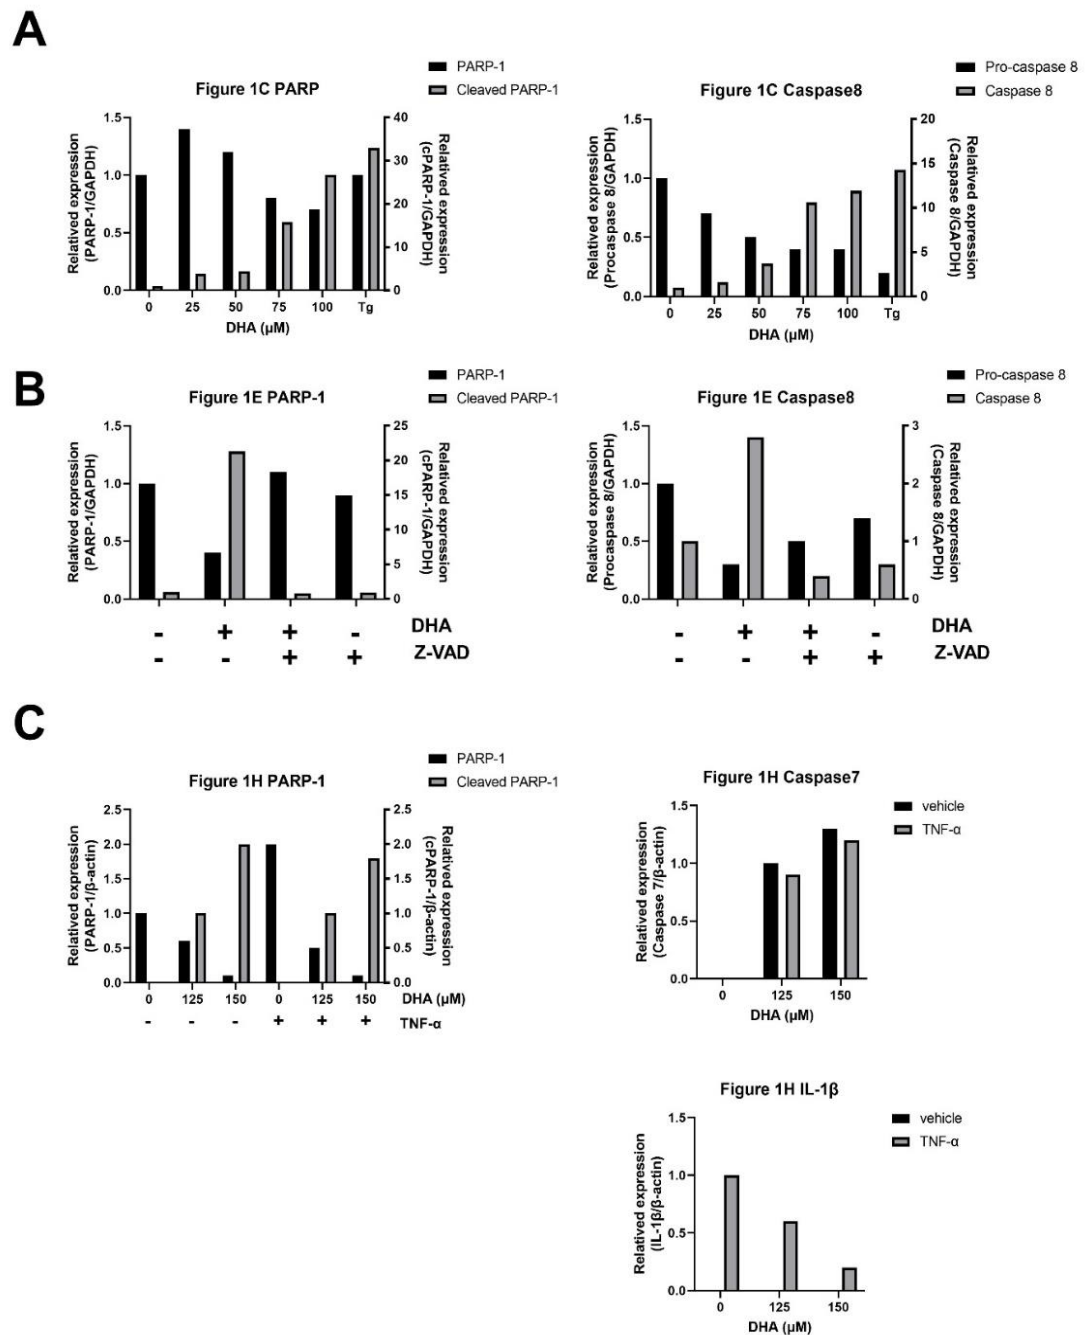

**Figure S1.** Graphs of quantified ratio values of each protein band shown in Figure 1. A ratio value was calculated by comparing the quantified protein band to the control (untreated). GAPDH (A, B) or  $\beta$ -actin (C) were used as controls, respectively.

**A**

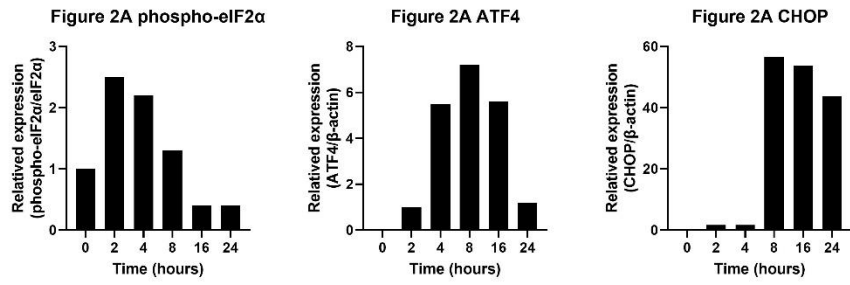

**B**

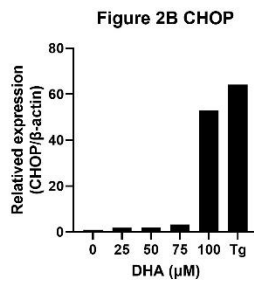

**Figure S2.** Graphs of quantified ratio values of each protein band shown in Figure 2. A ratio value was calculated by comparing the quantified protein band to the control (untreated). eIF2α or β-actin were used as controls, respectively.

**A**

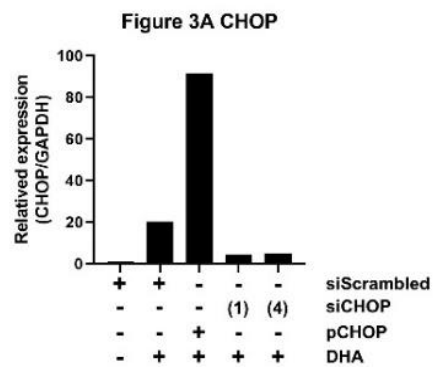

**Figure S3.** A graph of quantified ratio values of each protein band shown in Figure 3. A ratio value was calculated by comparing the quantified protein band to the control (untreated). GAPDH was used as a control.

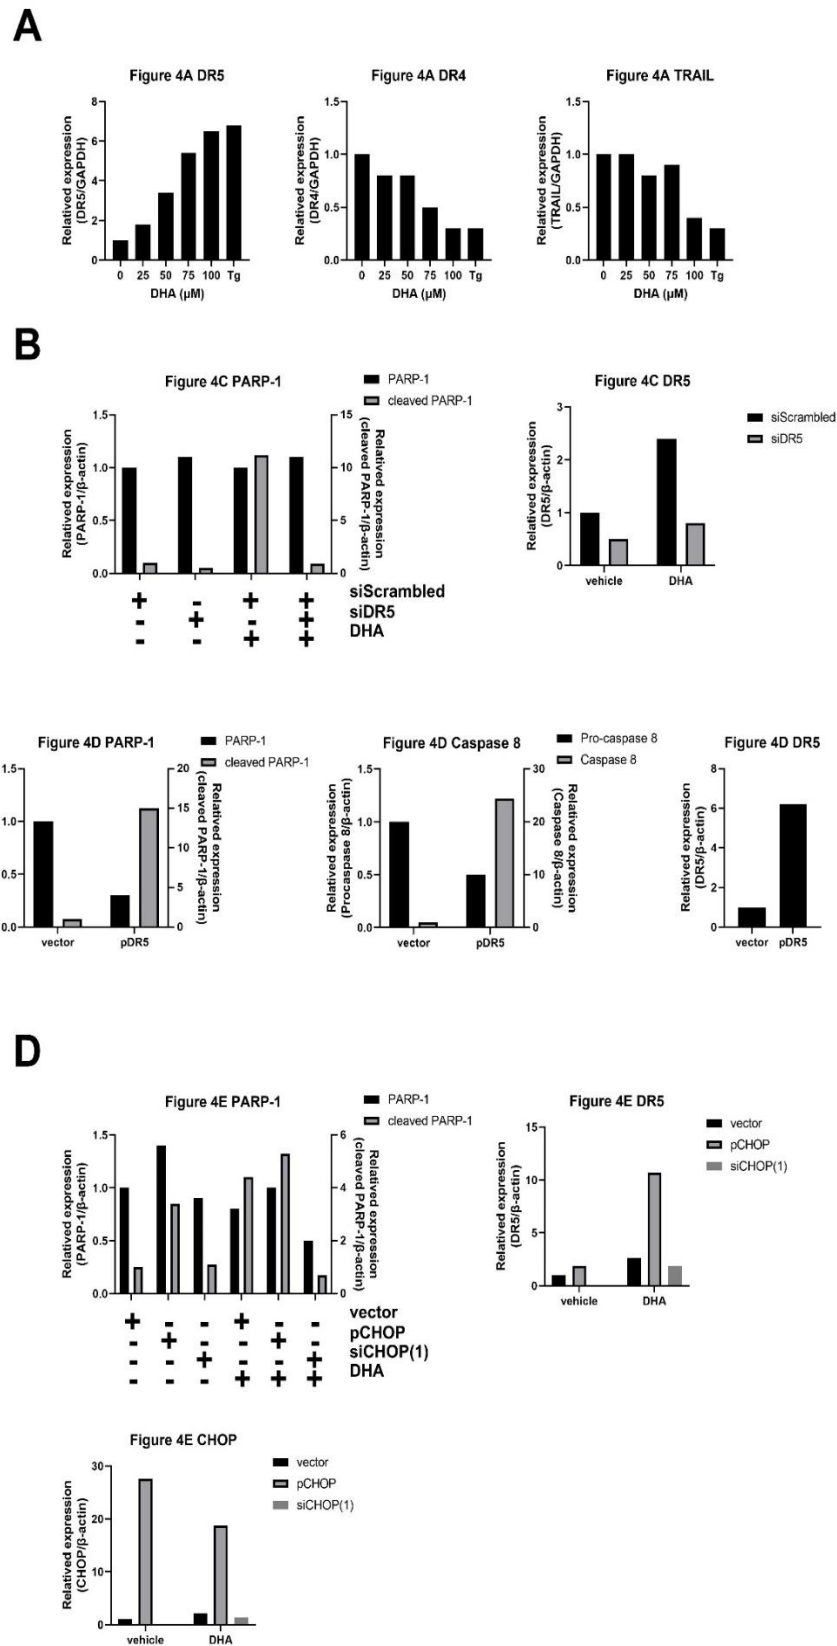

**Figure S4.** Graphs of quantified ratio values of each protein band shown in Figure 4. A ratio value was calculated by comparing the quantified protein band to the control (untreated). GAPDH (A) or  $\beta$ -actin (B, C, D) were used as controls, respectively.

**A**

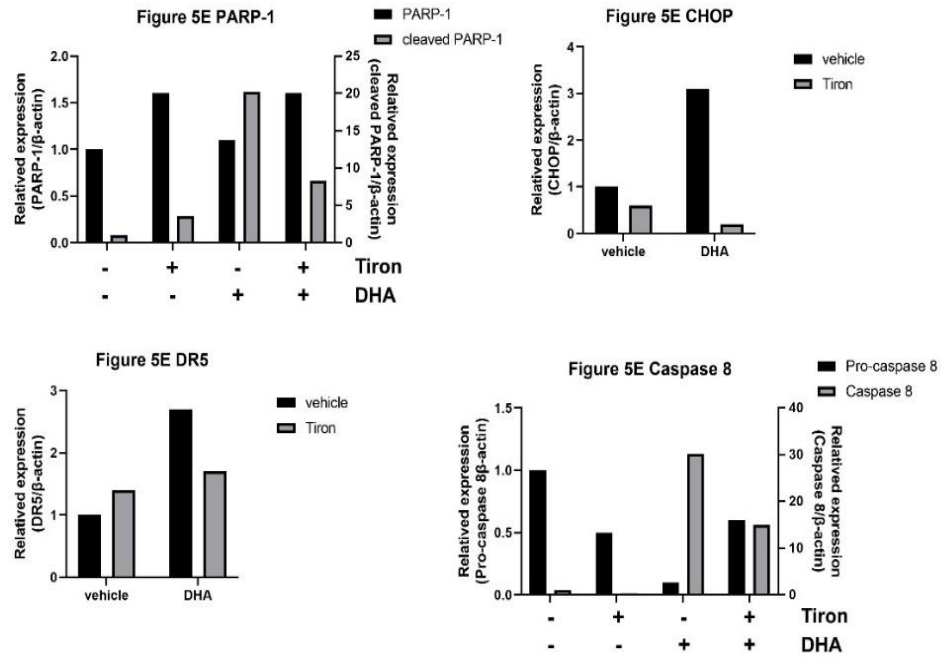

**Figure S5.** Graphs of quantified ratio values of each protein band shown in Figure 5. A ratio value was calculated by comparing the quantified protein band to the control (untreated).  $\beta$ -actin was used as a control.

**A**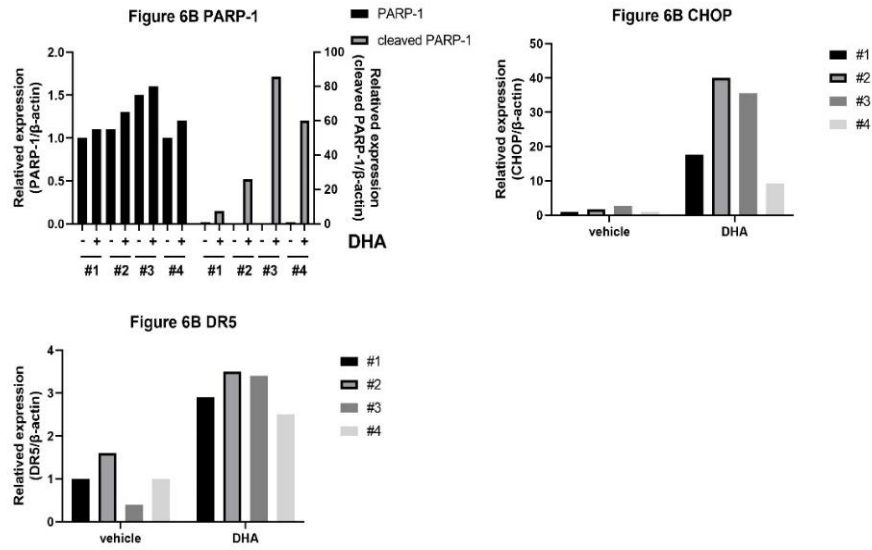**B**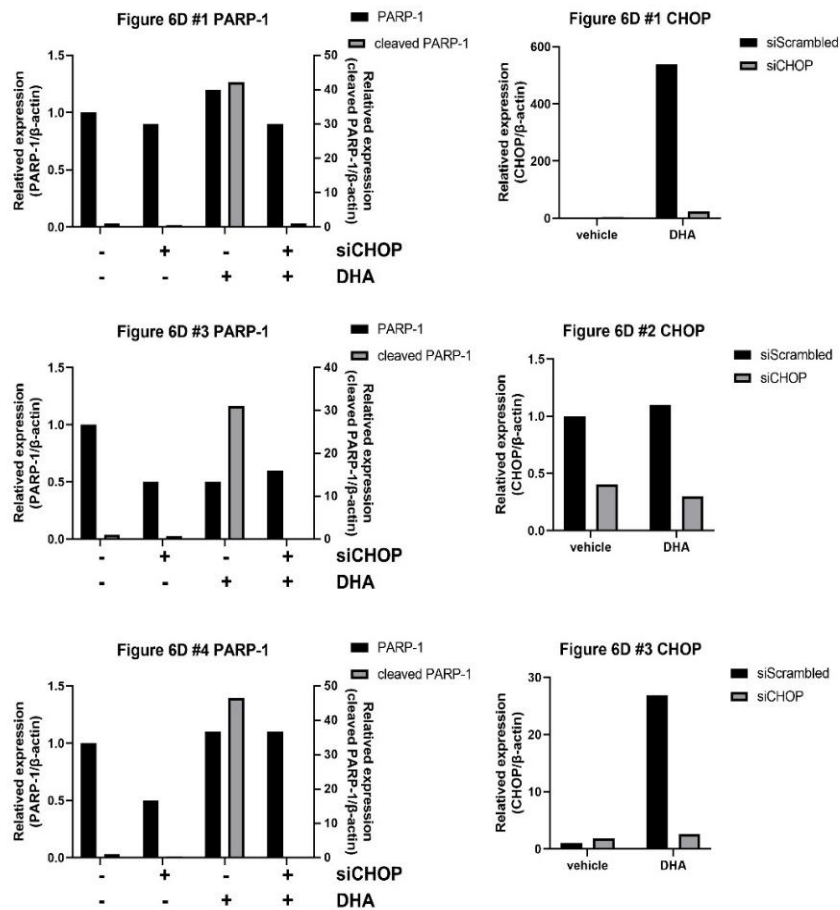

**Figure S6.** Graphs of quantified ratio values of each protein band shown in Figure 6. A ratio value was calculated by comparing the quantified protein band to the control (untreated).  $\beta$ -actin was used as a control.

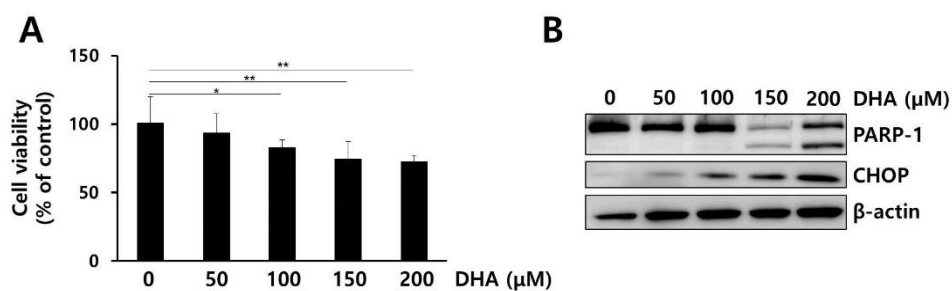

**Figure S7.** DHA induces apoptosis in A549 cells. (A) Cells were treated with various concentrations of DHA for 24 h and cell viability was determined by using Ez-cytox assay as described in the Materials and Methods. Data represent the means  $\pm$  S.D. of three independent experiments performed in triplicate. A Significant difference is indicated as \*  $p < 0.05$ , \*\*  $p < 0.01$ . (B) Cells were treated with various concentrations of DHA for 24 h and cell lysates were subjected to SDS-PAGE, followed by immunoblot analysis using antibodies specific to PARP-1, CHOP or  $\beta$ -actin.
